# Supplementary material
Source: bioRxiv or medRxiv preprint supplement (https://medrxiv.org/highwire/filestream/91224/field_highwire_adjunct_files/0/2020.04.25.20079103-1.pdf)
Supplement: Supplementary file [file 2020.04.25.20079103-1.pdf]

## Supporting information

### Asymptomatic SARS-CoV-2 infections: a living systematic review and meta-analysis

Diana Buitrago-Garcia, Dianne Egli-Gany, Michel J Counotte, Stefanie Hossmann, Hira Imeri,

Mert Aziz Ipekci, Georgia Salanti, Nicola Low Institute of Social and Preventive Medicine, University of Bern, Bern, Switzerland

| <b>Item</b> | <b>Title</b>                                                                                                   | <b>Page</b> |
|-------------|----------------------------------------------------------------------------------------------------------------|-------------|
| S1 Text     | Search strings                                                                                                 | 1           |
| S1 Table    | Types of study included in successive versions of the living systematic review, as of 10 June 2020             | 3           |
| S2 Table    | Location of studies contributing data to review questions 1 and 2                                              | 4           |
| S1 Figure   | Flow chart                                                                                                     | 5           |
| S2 Figure   | Review question 1, forest plot of included studies, by study precision                                         | 6           |
| S3 Figure   | Risk of bias in studies included in review question 1 and 2                                                    | 7           |
| S4 Figure   | Review question 2, forest plot of included studies, by study precision                                         | 8           |
| S5 Figure   | Sub-group analysis, review question 1, comparing studies of hospitalised patients with all other settings      | 9           |
| S6 Figure   | Sensitivity analysis, review question 1, omitting studies that were preprints at the time of literature search | 10          |
| S7 Figure   | Assessment of credibility of mathematical modelling studies                                                    | 11          |
| S1 PRISMA   | Checklist                                                                                                      | 12          |

## S1 Text. Search strings

From: Living Evidence on COVID-19 (<https://ispmbern.github.io/covid-19/living-review/collectingdata.html>, accessed 10.06.2020)

We retrieve data from [EMBASE](#) via OVID, [MEDLINE](#) via PubMed, BioRxiv and MedRxiv.

### Search terms

When searches are updated, references that are identified that were not in the database before, are inserted by date (**date\_entrez**) they were indexed in remote database, the date they are inserted in OUR database is formatted as the '**strategydate**' (raw data is available [here](#)).

#### 01.05.2020

EMBASE:

```
(SARS coronavirus/ or middle east respiratory syndrome/ or severe acute respiratory syndrome/ or (coronavirus* or corona virus* or HCoV* or ncov* or covid or covid19 or sars-cov* or sarscov* or Sars-coronavirus* or Severe Acute Respiratory Syndrome Coronavirus*).mp.) and 20191201:20301231.(dc).
```

#### 29.04.2020

MEDLINE:

```
("coronavirus"[MH] OR "coronavirus infections"[MH] OR "coronavirus"[TW] OR "corona virus"[TW] OR "HCoV"[TW] OR "nCov"[TW] OR "covid"[TW] OR "covid19"[TW] OR "Severe Acute Respiratory Syndrome Coronavirus 2"[TW] OR "SARS-CoV2"[TW] OR "SARS-CoV 2"[TW] OR "SARS Coronavirus 2"[TW] OR "MERS-CoV"[TW]) AND (2019/1/1:3000[PDAT])
```

#### 01.04.2020

From 01.04.2020, we retrieve the currate BioRxiv/MedRxiv dataset [Link](#)

#### 26.03.2020

MEDLINE:

```
("Wuhan coronavirus" [Supplementary Concept] OR "COVID-19" OR SARS-CoV-2 OR "2019 ncov"[tiab] OR (("novel coronavirus"[tiab] OR "new coronavirus"[tiab]) AND (wuhan[tiab] OR 2019[tiab])) OR 2019-nCoV[All Fields] OR (wuhan[tiab] AND coronavirus[tiab]))
```

EMBASE:

```
(nCov or 2019-nCoV or ((new or novel or wuhan) adj3 coronavirus) or covid19 or covid-19 or SARS-CoV-2).mp.
```

BioRxiv/MedRxiv:

```
ncov or corona or wuhan or COVID or SARS-CoV-2
```

With the kind support of the [Public Health & Primary Care Library PHC](#), and following guidance of the [Medical Library Association](#)

**01.01.2020**

MEDLINE:

```
("Wuhan coronavirus" [Supplementary Concept] OR "COVID-19" OR "2019  
ncov"[tiab] OR (("novel coronavirus"[tiab] OR "new coronavirus"[tiab]) AND  
(wuhan[tiab] OR 2019[tiab])) OR 2019-nCoV[All Fields] OR (wuhan[tiab] AND  
coronavirus[tiab]))))
```

EMBASE:

```
ncov OR (wuhan AND corona) OR COVID
```

BioRxiv/MedRxiv:

```
ncov or corona or wuhan or COVID
```

We retained publications that used the keywords listed below in the title or abstract.

```
"asyp*" OR "pre-symp*" OR "presymp*" OR "preclinical" OR "pre-clinical" OR "without symptoms"  
OR "no symptoms" OR "free of symptoms" OR "non-symp*" OR "nonsymp*" OR "symptom-free" OR  
"symptomfree"
```

**S1 Table. Changes over time in types of evidence about asymptomatic SARS-CoV-2 infection. Number of new studies identified, by date of search**

| Version                            | Version 1      | Version 2             | Version 3      | Overall         |
|------------------------------------|----------------|-----------------------|----------------|-----------------|
| Search date                        | 25.03.2020     | 20.04.2020            | 10.06.2020     |                 |
| Observational studies              |                |                       |                |                 |
| Contact investigation              | 6              | 4 <sup>a</sup>        | 7              | 17 <sup>a</sup> |
| Evacuation                         | 2 <sup>b</sup> | ..                    | ..             | ..              |
| Contact investigation, aggregated  | ..             | 2                     | 7 <sup>c</sup> | 9 <sup>c</sup>  |
| Outbreak investigation             | ..             | 4 <sup>c</sup>        | 8              | 12              |
| Screening                          | ..             | 4 <sup>b</sup>        | 4              | 8 <sup>b</sup>  |
| Hospitalised adults                | ..             | 8 <sup>d</sup>        | 10             | 18 <sup>d</sup> |
| Hospitalised children              | ..             | 3                     | 7              | 10              |
| Hospitalised adults and children   | ..             | ..                    | 10             | 10              |
| Secondary attack rate <sup>e</sup> | ..             | ..                    | 1 <sup>e</sup> | 1               |
| Statistical modelling              | 1              | 0                     | 0              | 1               |
| Mathematical modelling             | 2              | 2                     | 4              | 8               |
| <b>Total</b>                       | <b>11</b>      | <b>25<sup>b</sup></b> | <b>58</b>      | <b>94</b>       |

Footnotes refer to specific studies, where data from one version have been updated in a new publication. Citations use the number of the study in the reference list in the main text.

- a. In version 3, one study (Le TQM [30]) does not appear in forest plot because participants were included in a larger study (Wong J [103]), which was categorised with hospitalised adults)
- b. In version 2, studies of evacuees re-distributed into new categories: screening (Arima Y [28], which replaces Nishiura H [25]) and hospitalised adults (Tabata S [27]). In overall column total, include in their new category. In column total for version 2, these studies are not included because they were not newly identified studies;
- c. In version 3, one study (Kimball A [35]) replaced (by Arons M [58]) with updated data
- d. In version 3, one study (Breslin N [29]) replaced (by Andrikopoulou [56]) with updated data
- e. New category in version 3. Chaw L [65] contributes data only to calculation of secondary attack rate. Four studies in other categories also contribute to this analysis

**S2 Table. Country in which studies were done to estimate proportions of asymptomatic and pre-symptomatic SARS-CoV-2 infections**

**Review question 1, proportion of asymptomatic infection**

| <b>Country</b> | <b>Number of studies<sup>a</sup></b> | <b>SARS-CoV-2 cases, total</b> |
|----------------|--------------------------------------|--------------------------------|
| China          | 44                                   | 3619                           |
| Germany        | 6                                    | 174                            |
| South Korea    | 5                                    | 619                            |
| USA            | 5                                    | 298                            |
| Italy          | 3                                    | 556                            |
| United Kingdom | 3                                    | 200                            |
| India          | 2                                    | 465                            |
| Brunei         | 1                                    | 138                            |
| Cruise Ship    | 1                                    | 104                            |
| France         | 1                                    | 13                             |
| Iraq           | 1                                    | 15                             |
| Japan          | 1                                    | 12                             |
| Malaysia       | 1                                    | 4                              |
| Saudi Arabia   | 1                                    | 128                            |
| Spain          | 1                                    | 16                             |
| Taiwan         | 1                                    | 22                             |
| Thailand       | 1                                    | 11                             |
| Vietnam        | 1                                    | 208                            |
| <b>Total</b>   | <b>79</b>                            | <b>6602</b>                    |

**Review question 2: proportion of pre-symptomatic infection**

| <b>Country</b>       | <b>Number of studies<sup>a</sup></b> | <b>Asymptomatic SARS-CoV-2 cases at time of testing, total</b> |
|----------------------|--------------------------------------|----------------------------------------------------------------|
| China                | 14                                   | 353                                                            |
| South Korea          | 3                                    | 75                                                             |
| USA                  | 3                                    | 104                                                            |
| Germany              | 2                                    | 8                                                              |
| Japan                | 2                                    | 48                                                             |
| Brunei               | 1                                    | 138                                                            |
| Greece               | 1                                    | 39                                                             |
| Italy                | 1                                    | 39                                                             |
| Malaysia             | 1                                    | 2                                                              |
| United Arab Emirates | 1                                    | 7                                                              |
| United Kingdom       | 2                                    | 60                                                             |
| <b>Total</b>         | <b>31</b>                            | <b>873</b>                                                     |

<sup>a</sup> A study can contribute data to more than one review question.

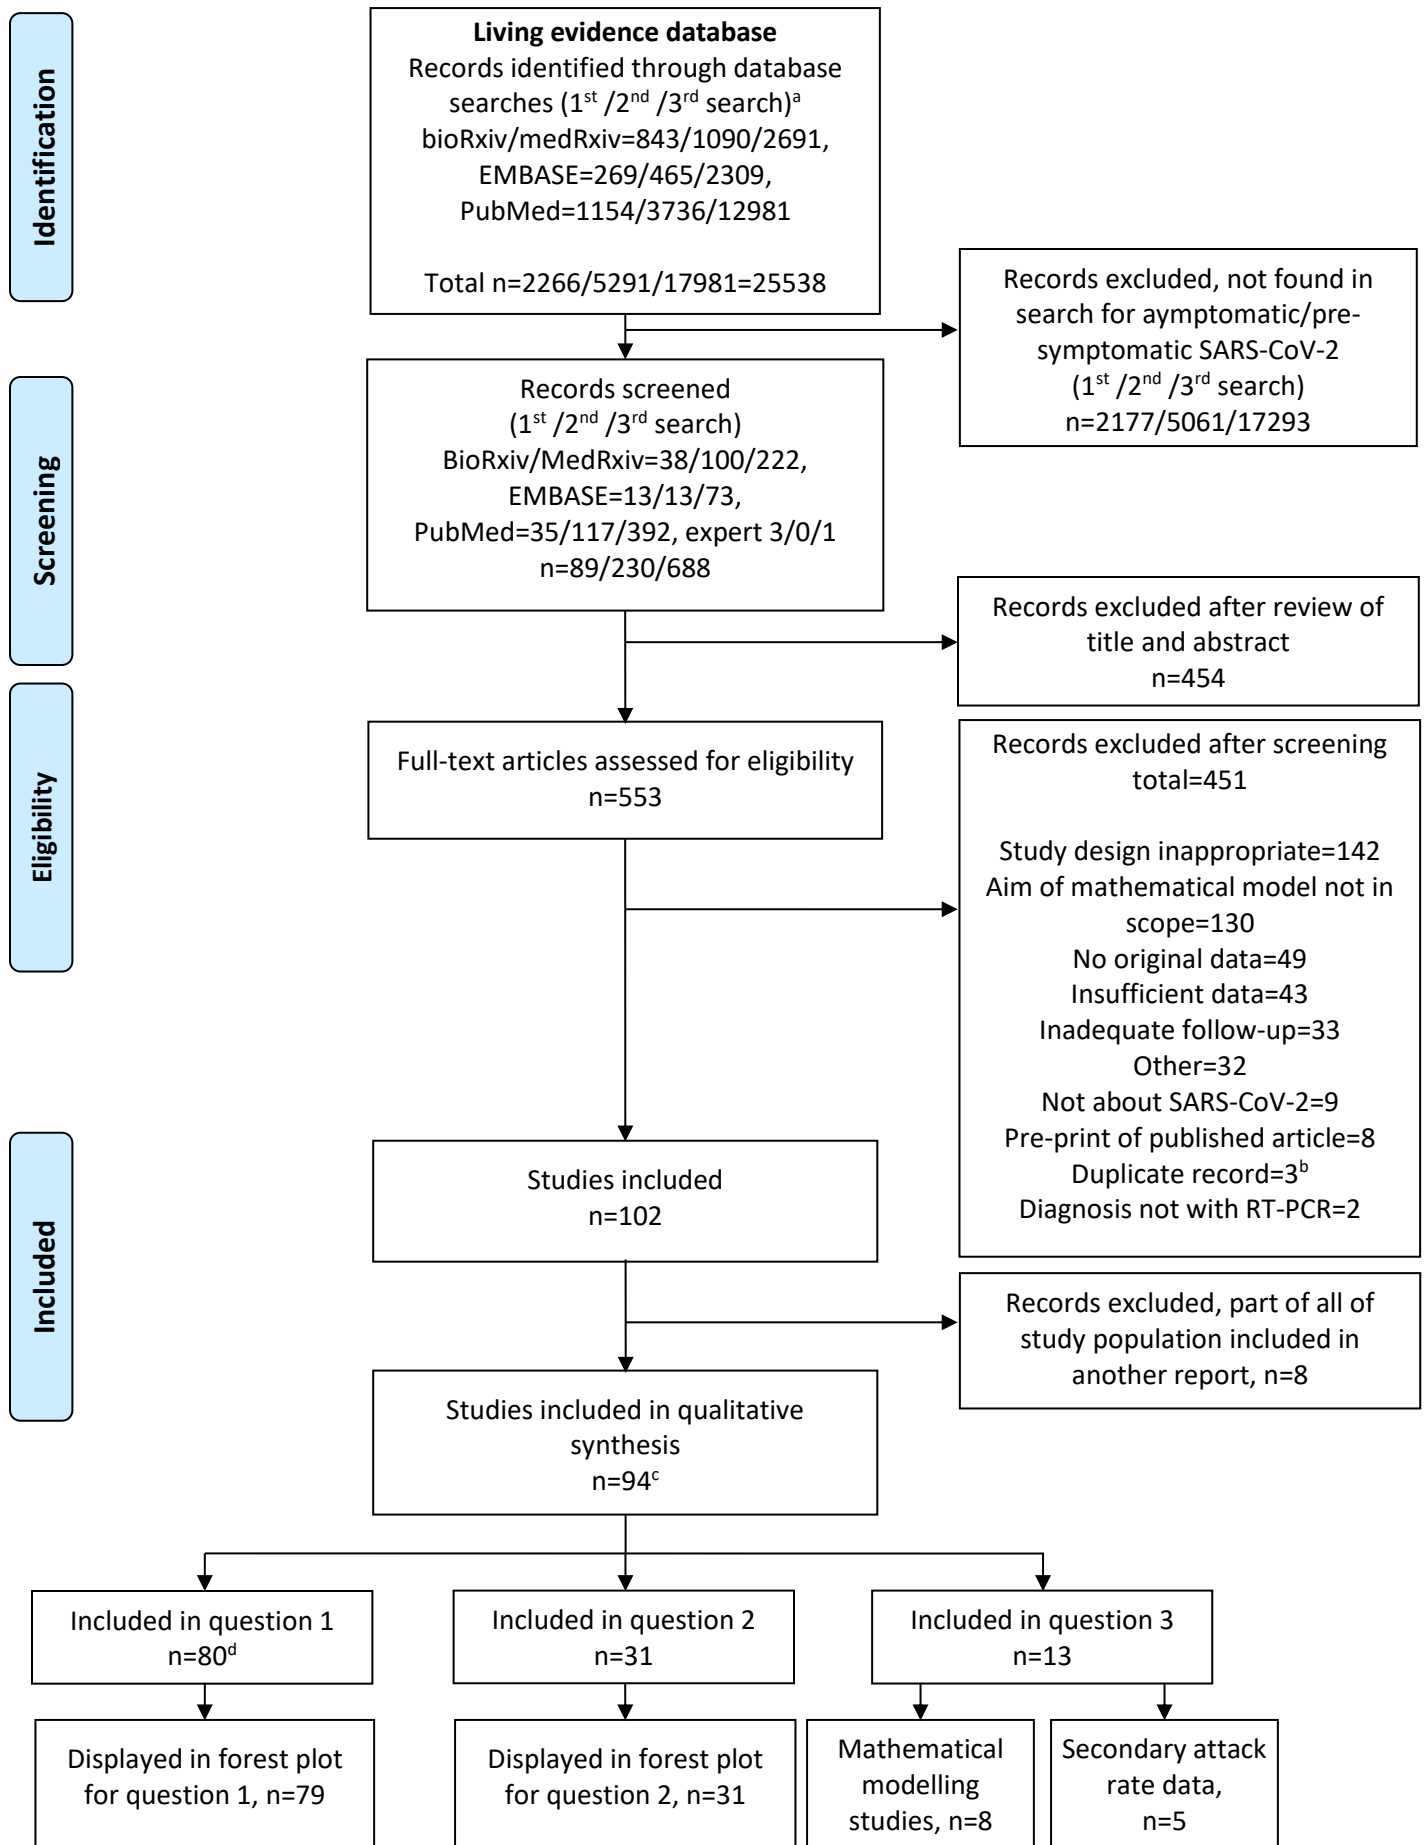

**Figure S1. Flow chart of identified, excluded and included records as of 10 June 2020**

<sup>a</sup> Numbers of new records at each search: 1<sup>st</sup> search, 25.03.2020; 2<sup>nd</sup> search, 20.04.2020; 3<sup>rd</sup> search, 10.06.2020

<sup>b</sup> Duplicate records are identical articles in different databases, found after automated de-duplication

<sup>c</sup> 11 studies were included in the first review and 37 studies were included in the first update

<sup>d</sup> Study by Mizumoto et al. in qualitative synthesis but not included in forest plot

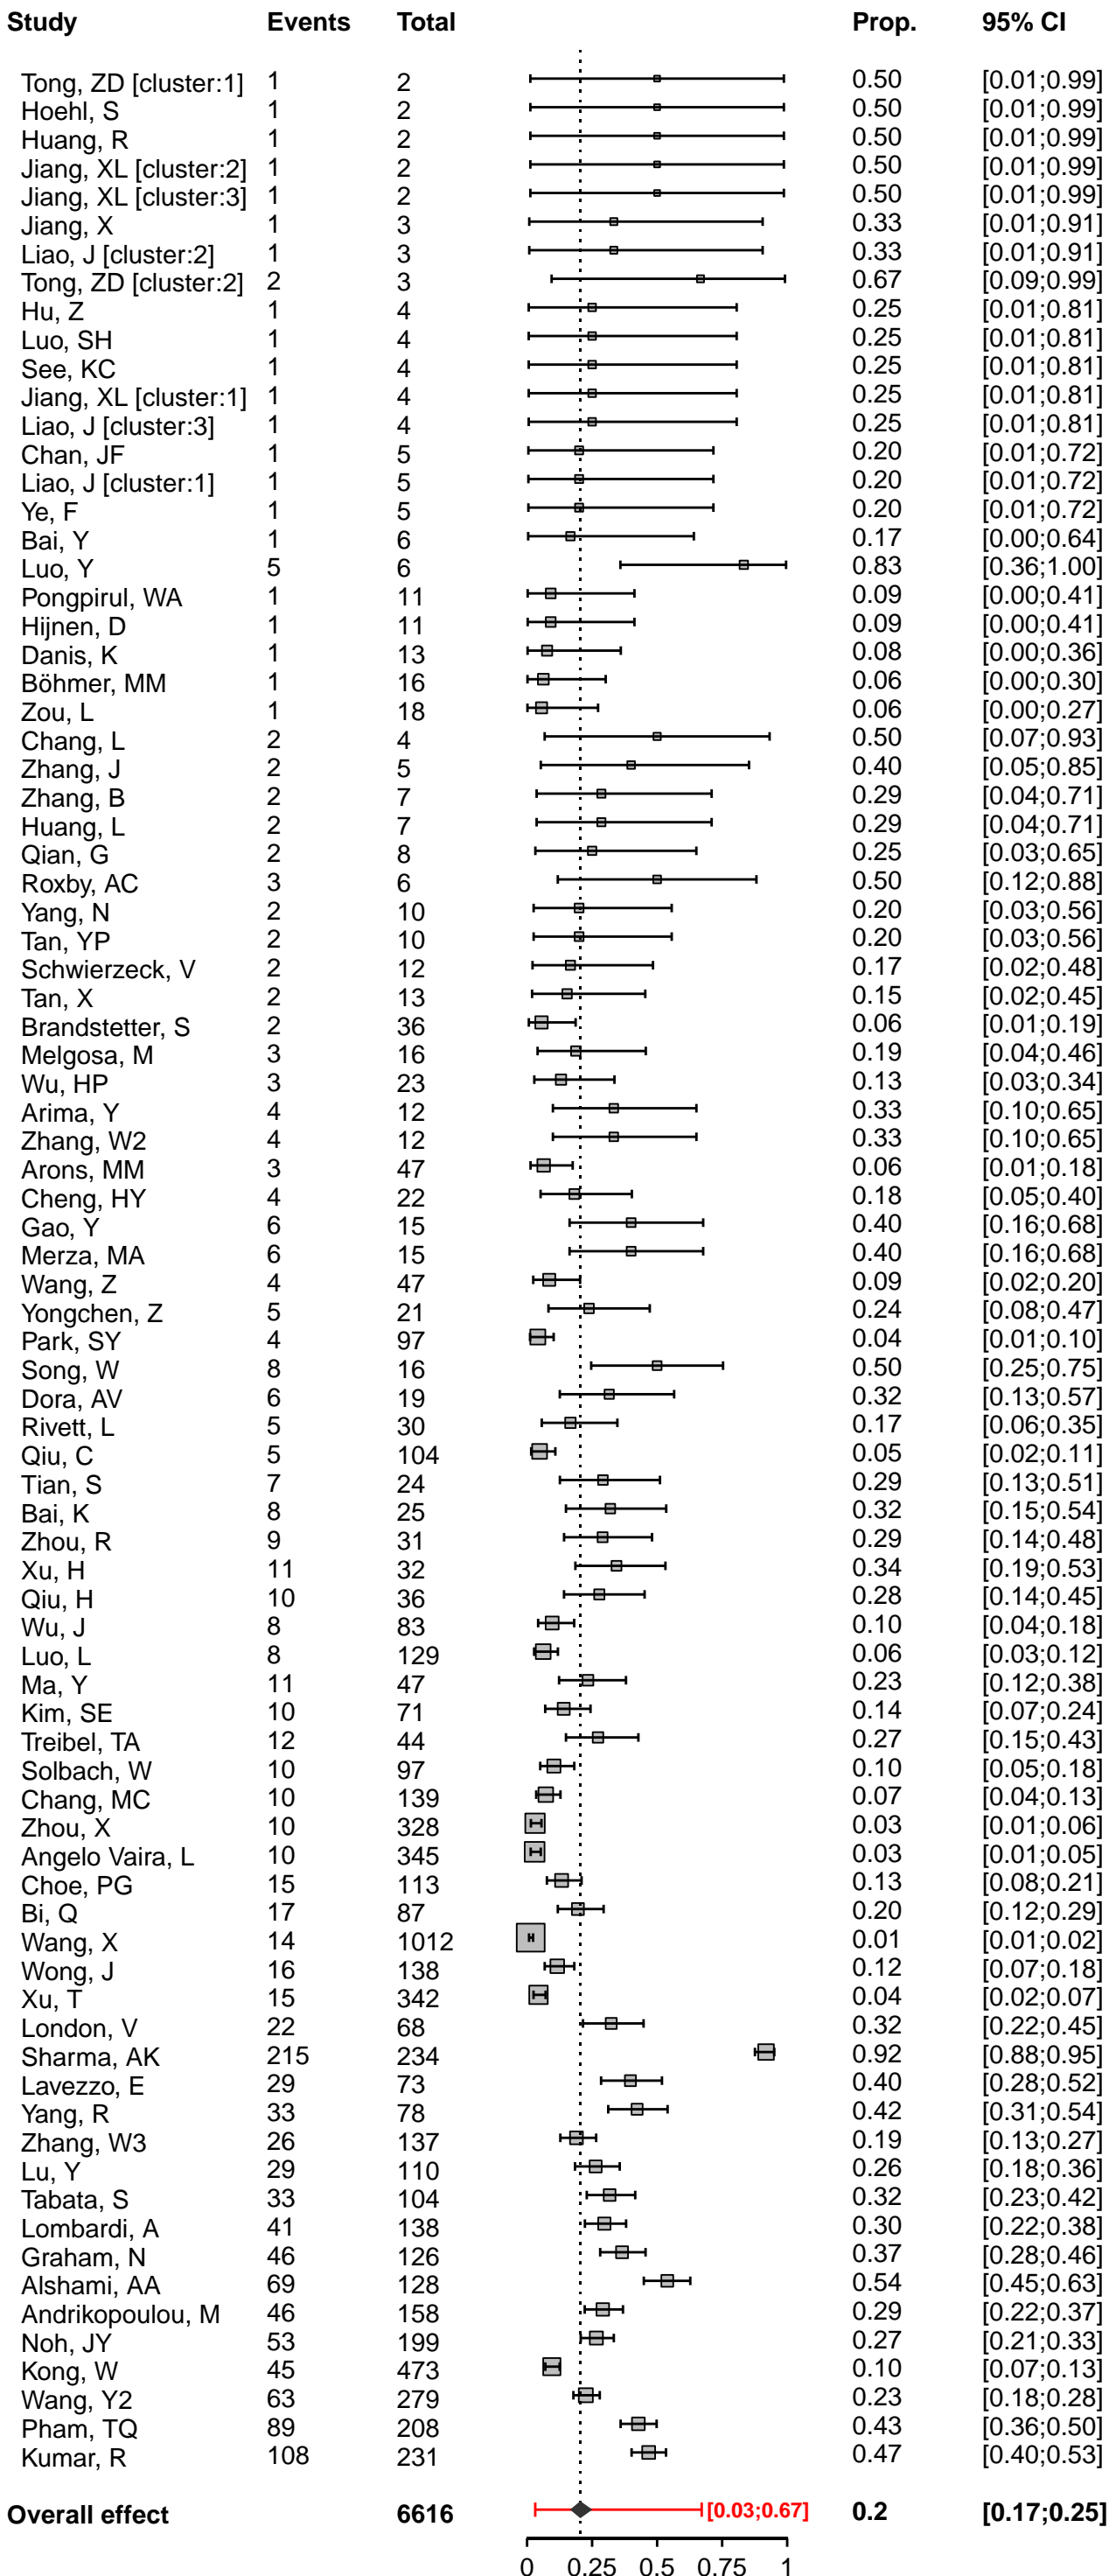

**S2 Figure. Review question 1, forest plot of included studies, by study precision**

The size of the shaded square is proportional to study size; solid diamond is the summary proportion and 95% confidence interval, estimated from random effects meta-analysis; red line is the prediction interval.

S3 Figure. Risk of bias and reporting quality of observational studies assessing proportion of asymptomatic and pre-symptomatic SARS-CoV-2 infection [11,12]

| Author                                    | 1                            | 2                                     | 3                                         | 4                                     | 5                                  | 6                                             | 7                                            | 8a                                              | 8b                 | 9                                         | 10                                  | 11a                                                       | 11b                                                       | 12                                                                                               |
|-------------------------------------------|------------------------------|---------------------------------------|-------------------------------------------|---------------------------------------|------------------------------------|-----------------------------------------------|----------------------------------------------|-------------------------------------------------|--------------------|-------------------------------------------|-------------------------------------|-----------------------------------------------------------|-----------------------------------------------------------|--------------------------------------------------------------------------------------------------|
|                                           | Clear criteria for inclusion | RT-PCR diagnosis for all participants | Asymptomatic status at start of follow-up | Consecutive inclusion of participants | Complete inclusion of participants | Reporting of the demographics of participants | Reporting of clinical information (symptoms) | Symptom status of cases at the end of follow-up | Adequate follow-up | Reporting of the site/clinic demographics | Numerator and denominator available | Study population adequate sample of the source population | Study population adequate sample of the target population | The assessment of the secondary attack rate was adequate and similar in all groups (low risk of) |
| <b>Contact investigations</b>             |                              |                                       |                                           |                                       |                                    |                                               |                                              |                                                 |                    |                                           |                                     |                                                           |                                                           |                                                                                                  |
| Tong, ZD                                  | Yes                          | Yes                                   | Yes                                       | Yes                                   | Yes                                | Yes                                           | Yes                                          | Yes                                             | Yes                | Yes                                       | Yes                                 | Yes                                                       | No                                                        | NA                                                                                               |
| 735: Huang, R                             | Yes                          | Yes                                   | Yes                                       | Yes                                   | Yes                                | Yes                                           | Yes                                          | Yes                                             | Yes                | Yes                                       | Yes                                 | Yes                                                       | No                                                        | NA                                                                                               |
| 344: Jiang, XL                            | Yes                          | Yes                                   | Yes                                       | Yes                                   | Yes                                | Yes                                           | Yes                                          | Yes                                             | Yes                | Yes                                       | Yes                                 | Yes                                                       | No                                                        | NA                                                                                               |
| 372: Jiang, X                             | Yes                          | Yes                                   | Yes                                       | Yes                                   | Yes                                | Yes                                           | No                                           | Yes                                             | Yes                | Yes                                       | Yes                                 | Yes                                                       | No                                                        | NA                                                                                               |
| 36: Liao, J                               | Yes                          | Yes                                   | Yes                                       | Yes                                   | Yes                                | Yes                                           | Yes                                          | Yes                                             | Yes                | Yes                                       | Yes                                 | Yes                                                       | No                                                        | NA                                                                                               |
| 22: Hu, Z                                 | Yes                          | Yes                                   | Yes                                       | Yes                                   | Yes                                | Yes                                           | Yes                                          | Yes                                             | Yes                | Yes                                       | Yes                                 | Yes                                                       | No                                                        | NA                                                                                               |
| 42: Luo, SH                               | Yes                          | Yes                                   | Yes                                       | Yes                                   | No                                 | No                                            | Yes                                          | Yes                                             | Yes                | Yes                                       | Yes                                 | Yes                                                       | No                                                        | NA                                                                                               |
| 11: Chan, JF                              | Yes                          | Yes                                   | Yes                                       | Yes                                   | Yes                                | Yes                                           | Yes                                          | Yes                                             | Yes                | Yes                                       | Yes                                 | Yes                                                       | No                                                        | NA                                                                                               |
| 180: Ye, F                                | Yes                          | Yes                                   | Yes                                       | Yes                                   | Yes                                | Yes                                           | Yes                                          | Yes                                             | Yes                | Yes                                       | Yes                                 | Yes                                                       | No                                                        | NA                                                                                               |
| 4: Bai, Y                                 | Yes                          | Yes                                   | Yes                                       | Yes                                   | Yes                                | No                                            | Yes                                          | Yes                                             | Yes                | Yes                                       | Yes                                 | Yes                                                       | No                                                        | NA                                                                                               |
| 374: Luo, Y                               | Yes                          | Yes                                   | Yes                                       | Yes                                   | Yes                                | No                                            | Yes                                          | Yes                                             | Yes                | Yes                                       | Yes                                 | Yes                                                       | No                                                        | NA                                                                                               |
| 142: Zhang, J                             | Yes                          | Yes                                   | Yes                                       | Yes                                   | Yes                                | No                                            | Yes                                          | Yes                                             | Yes                | Yes                                       | Yes                                 | Yes                                                       | No                                                        | NA                                                                                               |
| 389: Zhang, B                             | Yes                          | Yes                                   | Yes                                       | Yes                                   | Yes                                | Yes                                           | Yes                                          | Yes                                             | Yes                | Yes                                       | Yes                                 | Yes                                                       | No                                                        | NA                                                                                               |
| 449: Huang, L                             | Yes                          | Yes                                   | Yes                                       | Yes                                   | Yes                                | Yes                                           | Yes                                          | Yes                                             | Yes                | Yes                                       | Yes                                 | Yes                                                       | No                                                        | NA                                                                                               |
| 54: Qian, G                               | Yes                          | Yes                                   | Yes                                       | Yes                                   | Yes                                | No                                            | Yes                                          | Yes                                             | Yes                | No                                        | Yes                                 | Yes                                                       | No                                                        | NA                                                                                               |
| 414: Gao, Y                               | Yes                          | Yes                                   | Yes                                       | Yes                                   | Yes                                | Yes                                           | No                                           | Yes                                             | Yes                | Yes                                       | Yes                                 | Yes                                                       | No                                                        | NA                                                                                               |
| 563: Chaw, L                              | Yes                          | Yes                                   | Yes                                       | Yes                                   | Yes                                | Yes                                           | Yes                                          | Yes                                             | Yes                | Yes                                       | Yes                                 | Yes                                                       | No                                                        | NA                                                                                               |
| <b>Contact investigations, aggregated</b> |                              |                                       |                                           |                                       |                                    |                                               |                                              |                                                 |                    |                                           |                                     |                                                           |                                                           |                                                                                                  |
| 599: Hijen, P                             | Yes                          | Yes                                   | Yes                                       | Yes                                   | No                                 | Yes                                           | Yes                                          | Yes                                             | Yes                | Yes                                       | Yes                                 | Yes                                                       | No                                                        | NA                                                                                               |
| 665: Brandstetter, S                      | Yes                          | Yes                                   | Yes                                       | Yes                                   | No                                 | Yes                                           | Yes                                          | Yes                                             | Yes                | Yes                                       | Yes                                 | Yes                                                       | No                                                        | NA                                                                                               |
| 821: Zhang, W2                            | Yes                          | Yes                                   | Yes                                       | Yes                                   | Yes                                | No                                            | Yes                                          | Yes                                             | Yes                | Yes                                       | Yes                                 | Yes                                                       | Yes                                                       | Yes                                                                                              |
| 477: Cheng, HY                            | Yes                          | Yes                                   | Yes                                       | Yes                                   | Yes                                | No                                            | No                                           | Yes                                             | Yes                | Yes                                       | Yes                                 | Yes                                                       | Yes                                                       | Yes                                                                                              |
| 249: Wang, Z                              | No                           | Yes                                   | Yes                                       | Unclear                               | No                                 | No                                            | Yes                                          | Unclear                                         | Unclear            | Yes                                       | Yes                                 | Unclear                                                   | No                                                        | NA                                                                                               |
| 597: Wu, J                                | Yes                          | Yes                                   | Yes                                       | Yes                                   | Yes                                | No                                            | Yes                                          | Yes                                             | Yes                | Yes                                       | Yes                                 | Yes                                                       | No                                                        | NA                                                                                               |
| 122: Luo, L                               | Yes                          | Yes                                   | Yes                                       | Yes                                   | Yes                                | Yes                                           | Yes                                          | Yes                                             | Yes                | Yes                                       | Yes                                 | Yes                                                       | Yes                                                       | Yes                                                                                              |
| 443: Bi, Q                                | Yes                          | Yes                                   | Yes                                       | Yes                                   | No                                 | No                                            | Yes                                          | Yes                                             | Yes                | Yes                                       | Yes                                 | Yes                                                       | Yes                                                       | NA                                                                                               |
| 908: Yang, R                              | Yes                          | Yes                                   | Yes                                       | Yes                                   | Yes                                | No                                            | Yes                                          | Yes                                             | Yes                | Yes                                       | Yes                                 | Yes                                                       | No                                                        | NA                                                                                               |
| <b>Outbreak investigations</b>            |                              |                                       |                                           |                                       |                                    |                                               |                                              |                                                 |                    |                                           |                                     |                                                           |                                                           |                                                                                                  |
| 242: Danis, K                             | Yes                          | Yes                                   | Yes                                       | Yes                                   | Yes                                | No                                            | Yes                                          | Yes                                             | Yes                | Yes                                       | Yes                                 | Yes                                                       | No                                                        | NA                                                                                               |
| 713: Böhmer, MM                           | Yes                          | Yes                                   | Yes                                       | Yes                                   | Yes                                | No                                            | Yes                                          | Yes                                             | Yes                | Yes                                       | Yes                                 | Yes                                                       | Unclear                                                   | NA                                                                                               |
| 763: Roxby, AC                            | Yes                          | Yes                                   | Yes                                       | Yes                                   | No                                 | No                                            | Yes                                          | Yes                                             | Yes                | Yes                                       | Yes                                 | Yes                                                       | No                                                        | NA                                                                                               |
| 152: Yang, N                              | Yes                          | Yes                                   | Yes                                       | Yes                                   | No                                 | Yes                                           | Yes                                          | Yes                                             | Yes                | Yes                                       | Yes                                 | No                                                        | No                                                        | NA                                                                                               |
| 396: Schwierzeck, V                       | Yes                          | Yes                                   | Yes                                       | Yes                                   | No                                 | Yes                                           | Yes                                          | Yes                                             | Yes                | Yes                                       | Yes                                 | Yes                                                       | No                                                        | NA                                                                                               |
| 376: Arons, MM                            | Yes                          | Yes                                   | Yes                                       | Yes                                   | Yes                                | No                                            | No                                           | Yes                                             | Yes                | Yes                                       | Yes                                 | Yes                                                       | No                                                        | NA                                                                                               |
| 354: Park, SY                             | Yes                          | Yes                                   | Yes                                       | Yes                                   | Yes                                | No                                            | No                                           | Yes                                             | Yes                | Yes                                       | Yes                                 | Yes                                                       | Yes                                                       | Yes                                                                                              |
| 849: Dora, AV                             | Yes                          | Yes                                   | Yes                                       | Yes                                   | Yes                                | Yes                                           | Yes                                          | Yes                                             | Yes                | Yes                                       | Yes                                 | Yes                                                       | No                                                        | NA                                                                                               |
| 265: Tian, S                              | Yes                          | Yes                                   | Yes                                       | Yes                                   | Yes                                | Yes                                           | Yes                                          | Yes                                             | Yes                | Yes                                       | Yes                                 | Yes                                                       | Yes                                                       | NA                                                                                               |
| 899: Solbach, W                           | Yes                          | Yes                                   | Yes                                       | Yes                                   | No                                 | No                                            | No                                           | Yes                                             | Yes                | Yes                                       | Yes                                 | Yes                                                       | Yes                                                       | NA                                                                                               |
| 1003: Graham, N                           | Yes                          | Yes                                   | Yes                                       | Yes                                   | No                                 | Yes                                           | Yes                                          | Yes                                             | Yes                | Yes                                       | Yes                                 | Yes                                                       | No                                                        | NA                                                                                               |
| 696: Pham, TQ                             | Yes                          | Yes                                   | Yes                                       | Yes                                   | Yes                                | No                                            | No                                           | Yes                                             | Yes                | Yes                                       | Yes                                 | Yes                                                       | Yes                                                       | NA                                                                                               |
| <b>Screening</b>                          |                              |                                       |                                           |                                       |                                    |                                               |                                              |                                                 |                    |                                           |                                     |                                                           |                                                           |                                                                                                  |
| 317: Hoesli, S                            | Yes                          | Yes                                   | Yes                                       | Yes                                   | Yes                                | No                                            | No                                           | Yes                                             | Yes                | Yes                                       | Yes                                 | Yes                                                       | No                                                        | NA                                                                                               |
| 170: Chang, L                             | Yes                          | Yes                                   | Yes                                       | Yes                                   | Yes                                | No                                            | No                                           | Yes                                             | Yes                | No                                        | Yes                                 | Yes                                                       | No                                                        | NA                                                                                               |
| 224: Arima, Y                             | Yes                          | Yes                                   | Yes                                       | Yes                                   | Yes                                | No                                            | No                                           | Yes                                             | Yes                | Yes                                       | Yes                                 | No                                                        | No                                                        | NA                                                                                               |
| 598: Rivett, L                            | Yes                          | Yes                                   | Yes                                       | Yes                                   | Yes                                | No                                            | No                                           | Yes                                             | Yes                | Yes                                       | Yes                                 | Yes                                                       | No                                                        | NA                                                                                               |
| 622: Treibell, TA                         | Yes                          | Yes                                   | Yes                                       | Yes                                   | No                                 | No                                            | No                                           | Yes                                             | Yes                | No                                        | Yes                                 | Unclear                                                   | No                                                        | NA                                                                                               |
| 294: Lavezzo, E                           | Unclear                      | Yes                                   | Yes                                       | Unclear                               | No                                 | No                                            | No                                           | Yes                                             | Yes                | Yes                                       | Yes                                 | Yes                                                       | Unclear                                                   | NA                                                                                               |
| 593: Lombardi, A                          | Yes                          | Yes                                   | Yes                                       | Yes                                   | Yes                                | No                                            | Yes                                          | Yes                                             | Yes                | Yes                                       | Yes                                 | Yes                                                       | No                                                        | NA                                                                                               |
| 278: Lytras, T                            | Yes                          | Yes                                   | No                                        | Yes                                   | Yes                                | No                                            | Yes                                          | Yes                                             | Yes                | Yes                                       | Yes                                 | Yes                                                       | No                                                        | NA                                                                                               |
| <b>Hospitalised adults</b>                |                              |                                       |                                           |                                       |                                    |                                               |                                              |                                                 |                    |                                           |                                     |                                                           |                                                           |                                                                                                  |
| 204: Pongpirul, WA                        | Yes                          | Yes                                   | Yes                                       | Yes                                   | Yes                                | Yes                                           | Yes                                          | Yes                                             | Yes                | Yes                                       | Yes                                 | Yes                                                       | No                                                        | NA                                                                                               |
| 216: Zou, L                               | Yes                          | Yes                                   | Yes                                       | Yes                                   | Unclear                            | Yes                                           | Yes                                          | Yes                                             | Yes                | Yes                                       | Yes                                 | Yes                                                       | Unclear                                                   | NA                                                                                               |
| 521: Qiu, C                               | Yes                          | Yes                                   | Yes                                       | Yes                                   | Yes                                | Yes                                           | Yes                                          | Yes                                             | Yes                | Yes                                       | Yes                                 | Yes                                                       | No                                                        | NA                                                                                               |
| 761: Zhou, R                              | Yes                          | Yes                                   | Yes                                       | Yes                                   | Yes                                | No                                            | No                                           | Yes                                             | Yes                | Yes                                       | Yes                                 | Unclear                                                   | No                                                        | NA                                                                                               |
| 664: Chang, MC                            | Yes                          | Yes                                   | Yes                                       | Yes                                   | Yes                                | Yes                                           | No                                           | Yes                                             | Yes                | Yes                                       | Yes                                 | Yes                                                       | No                                                        | NA                                                                                               |
| 233: Zhou, X                              | Yes                          | Yes                                   | Yes                                       | Yes                                   | Yes                                | Yes                                           | Yes                                          | Yes                                             | Yes                | Yes                                       | Yes                                 | Yes                                                       | No                                                        | NA                                                                                               |
| 765: Angelo Vaira, L                      | Yes                          | Unclear                               | Yes                                       | Yes                                   | Yes                                | No                                            | Yes                                          | Yes                                             | Yes                | Yes                                       | Yes                                 | Yes                                                       | No                                                        | NA                                                                                               |
| 187: Wang, X                              | Yes                          | Yes                                   | Yes                                       | Yes                                   | Yes                                | Yes                                           | Yes                                          | Yes                                             | Yes                | Yes                                       | Yes                                 | Yes                                                       | No                                                        | NA                                                                                               |
| 506: Wong, J                              | Yes                          | Yes                                   | Yes                                       | Yes                                   | Yes                                | No                                            | No                                           | Yes                                             | Yes                | No                                        | Yes                                 | Yes                                                       | No                                                        | NA                                                                                               |
| 434: Xu, T                                | Yes                          | Yes                                   | Yes                                       | Yes                                   | Yes                                | Yes                                           | Yes                                          | Yes                                             | Yes                | Yes                                       | Yes                                 | Yes                                                       | No                                                        | NA                                                                                               |
| 729: London, V                            | Yes                          | Yes                                   | Yes                                       | Yes                                   | Unclear                            | No                                            | Yes                                          | Yes                                             | Yes                | Yes                                       | Yes                                 | Yes                                                       | No                                                        | NA                                                                                               |
| 164: Tabata, S                            | Yes                          | Yes                                   | Yes                                       | Yes                                   | Yes                                | Yes                                           | Yes                                          | No                                              | Yes                | Yes                                       | Yes                                 | No                                                        | No                                                        | NA                                                                                               |
| 832: Andrikopoulou, M                     | Yes                          | Yes                                   | Yes                                       | Yes                                   | Yes                                | No                                            | Yes                                          | Yes                                             | Yes                | Yes                                       | Yes                                 | Yes                                                       | No                                                        | NA                                                                                               |
| 797: Noh, JY                              | Unclear                      | Yes                                   | Yes                                       | Unclear                               | Unclear                            | No                                            | Yes                                          | Yes                                             | Yes                | Yes                                       | Yes                                 | Yes                                                       | Unclear                                                   | NA                                                                                               |
| 818: Kumar, R                             | Yes                          | Yes                                   | Yes                                       | Yes                                   | No                                 | Yes                                           | Yes                                          | Yes                                             | Yes                | Yes                                       | Yes                                 | Yes                                                       | No                                                        | NA                                                                                               |
| 267: Meng, H                              | Yes                          | Yes                                   | Yes                                       | Yes                                   | Unclear                            | Yes                                           | Yes                                          | Yes                                             | Yes                | Yes                                       | Yes                                 | Yes                                                       | No                                                        | NA                                                                                               |
| 491: Zhang, Z                             | Yes                          | Yes                                   | Yes                                       | Yes                                   | Yes                                | No                                            | Yes                                          | Yes                                             | Yes                | Yes                                       | Yes                                 | Yes                                                       | No                                                        | NA                                                                                               |
| 834: Al-Shamsi, HO                        | Yes                          | Yes                                   | Yes                                       | Yes                                   | Yes                                | Yes                                           | No                                           | Yes                                             | Yes                | Yes                                       | Yes                                 | Yes                                                       | No                                                        | NA                                                                                               |
| 71: Wang, Y1                              | Yes                          | Yes                                   | Yes                                       | Yes                                   | Yes                                | Yes                                           | No                                           | No                                              | Yes                | Yes                                       | Yes                                 | Yes                                                       | No                                                        | NA                                                                                               |
| <b>Hospitalised children</b>              |                              |                                       |                                           |                                       |                                    |                                               |                                              |                                                 |                    |                                           |                                     |                                                           |                                                           |                                                                                                  |
| 299: See, KC                              | Yes                          | Yes                                   | Yes                                       | Yes                                   | Yes                                | Yes                                           | Yes                                          | Yes                                             | Yes                | Yes                                       | Yes                                 | Unclear                                                   | No                                                        | NA                                                                                               |
| 275: Tan, YP                              | Yes                          | Yes                                   | Yes                                       | Yes                                   | Yes                                | Yes                                           | Yes                                          | Yes                                             | Yes                | Yes                                       | Yes                                 | Yes                                                       | No                                                        | NA                                                                                               |
| 334: Tan, X                               | Yes                          | Yes                                   | Yes                                       | Yes                                   | Yes                                | Yes                                           | Yes                                          | Yes                                             | Yes                | Yes                                       | Yes                                 | Yes                                                       | No                                                        | NA                                                                                               |
| 769: Melgosa, M                           | Yes                          | Yes                                   | Yes                                       | Yes                                   | Yes                                | No                                            | Yes                                          | Yes                                             | Yes                | Yes                                       | Yes                                 | Yes                                                       | No                                                        | NA                                                                                               |
| 843: Wu, HP                               | Yes                          | Yes                                   | Yes                                       | Yes                                   | Yes                                | No                                            | Yes                                          | Yes                                             | Yes                | Yes                                       | Yes                                 | Yes                                                       | No                                                        | NA                                                                                               |
| 481: Song, W                              | Yes                          | Yes                                   | Yes                                       | Yes                                   | Unclear                            | Yes                                           | Yes                                          | Yes                                             | Yes                | Yes                                       | Yes                                 | Yes                                                       | No                                                        | NA                                                                                               |
| 653: Bai, K                               | Yes                          | Yes                                   | Yes                                       | Yes                                   | No                                 | Yes                                           | Yes                                          | Yes                                             | Yes                | Yes                                       | Yes                                 | Yes                                                       | No                                                        | NA                                                                                               |
| 382: Xu, H                                | Yes                          | Yes                                   | Yes                                       | Yes                                   | Unclear                            | Yes                                           | Yes                                          | Yes                                             | Yes                | Unclear                                   | Yes                                 | Yes                                                       | No                                                        | NA                                                                                               |
| 141: Qiu, H                               | Yes                          | Yes                                   | Yes                                       | Yes                                   | Yes                                | Yes                                           | Yes                                          | Unclear                                         | Unclear            | Yes                                       | Yes                                 | Yes                                                       | No                                                        | NA                                                                                               |
| 556: Lu, Y                                | Yes                          | Yes                                   | Yes                                       | Yes                                   | Unclear                            | Yes                                           | Yes                                          | Yes                                             | Yes                | Yes                                       | Yes                                 | Yes                                                       | No                                                        | NA                                                                                               |
| <b>Hospitalised adults and children</b>   |                              |                                       |                                           |                                       |                                    |                                               |                                              |                                                 |                    |                                           |                                     |                                                           |                                                           |                                                                                                  |
| 637: Merza, MA                            | Yes                          | Yes                                   | Yes                                       | Yes                                   | Yes                                | Yes                                           | Yes                                          | Yes                                             | Yes                | Yes                                       | Yes                                 | Yes                                                       | No                                                        | NA                                                                                               |
| 328: Yongchen, Z                          | Yes                          | Yes                                   | Yes                                       | Yes                                   | Yes                                | No                                            | Yes                                          | Yes                                             | Yes                | Yes                                       | Yes                                 | Yes                                                       | No                                                        | NA                                                                                               |
| 585: Ma, Y                                | Yes                          | Yes                                   | Yes                                       | Yes                                   | Yes                                | Yes                                           | Yes                                          | Yes                                             | Yes                | Yes                                       | Yes                                 | Yes                                                       | No                                                        | NA                                                                                               |
| 559: Kim, SE                              | Yes                          | Yes                                   | Yes                                       | Yes                                   | Yes                                | Yes                                           | Yes                                          | Yes                                             | Yes                | Yes                                       | Yes                                 | Yes                                                       | Unclear                                                   | NA                                                                                               |
| 856: Choe, PG                             | Yes                          | Yes                                   | Yes                                       | Yes                                   | No                                 | Yes                                           | Yes                                          | Yes                                             | Yes                | Yes                                       | Yes                                 | No                                                        | No                                                        | NA                                                                                               |
| 981: Sharma, AK                           | Yes                          | Yes                                   | Yes                                       | Yes                                   | No                                 | No                                            | No                                           | Yes                                             | Yes                | Yes                                       | Yes                                 | Yes                                                       | No                                                        | NA                                                                                               |
| 745: Zhang, W3                            | Unclear                      | Yes                                   | Yes                                       | Yes                                   | No                                 | No                                            | Yes                                          | Yes                                             | Yes                | Yes                                       | Yes                                 | Unclear                                                   | No                                                        | NA                                                                                               |
| 726: Alshami, AA                          | Yes                          | Yes                                   | Yes                                       | Yes                                   | No                                 | No                                            | Yes                                          | Yes                                             | Yes                | Yes                                       | Yes                                 | Yes                                                       | Unclear                                                   | NA                                                                                               |
| 936: Kong, W                              | Yes                          | Yes                                   | Yes                                       | Yes                                   | No                                 | Yes                                           | Yes                                          | Yes                                             | Yes                | Yes                                       | Yes                                 | Yes                                                       | No                                                        | NA                                                                                               |
| 778: Wang, Y2                             | Yes                          | Yes                                   | Yes                                       | Yes                                   | Yes                                | Yes                                           | Unclear                                      | Yes                                             | Yes                | Yes                                       | Yes                                 | Yes                                                       | No                                                        | NA                                                                                               |

Adapted from two published assessment tools, citations refer to reference list in main text.  
 11. Joanna Briggs Institute checklist for case series, questions 1 to 10 (<http://joannabriggs.org/research/critical-appraisal-tools.html>)  
 12. Boyle MH. Guidelines for evaluating prevalence studies. Evidence Based Men Health 1998;1:37-40, questions 11a and 11b  
 Question 12 added by authors to assess risk of selection bias for participants in studies reporting secondary attack rate



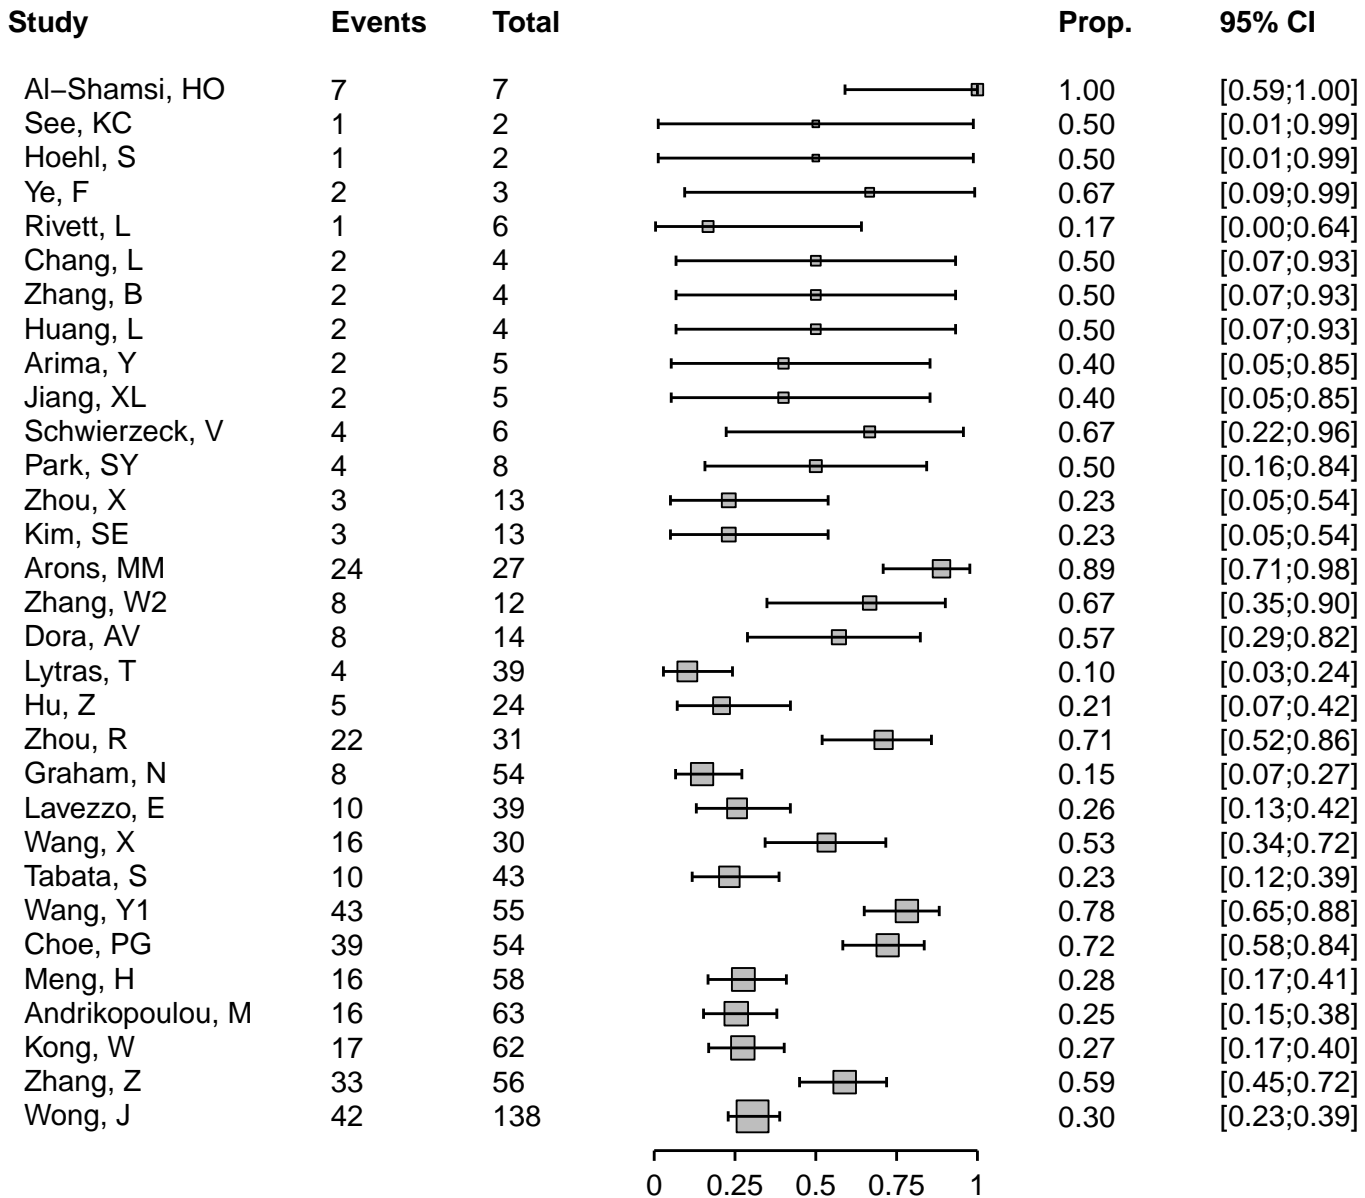

S4 Figure: Review question 2, forest plot of included studies, by study precision

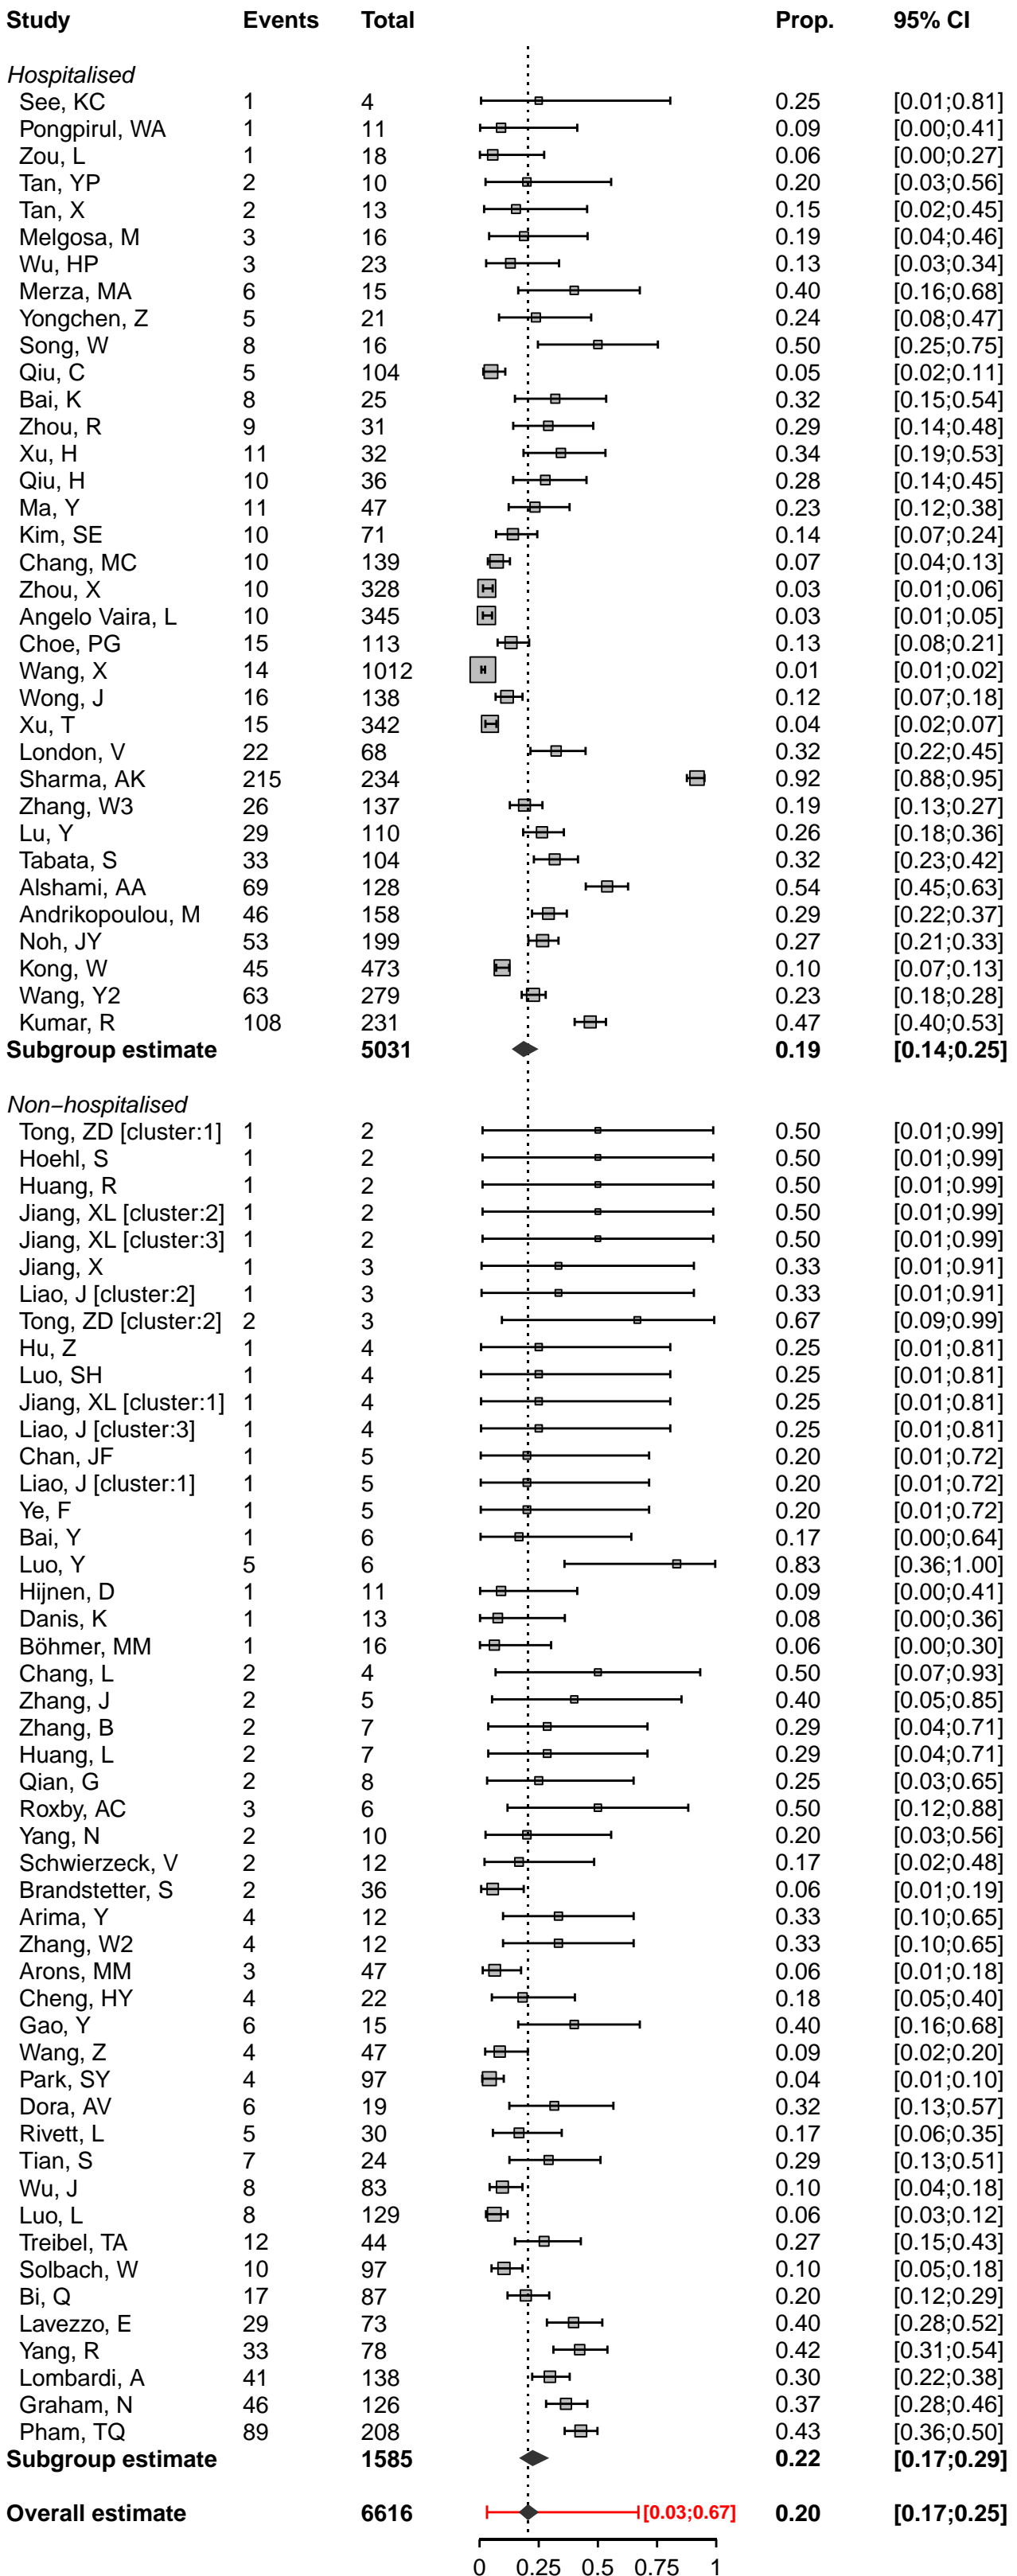

**S5 Figure: Review question 1, sub-group analysis comparing studies of hospitalised patients with all other settings**

The size of the shaded square is proportional to study size; solid diamond is the summary proportion and 95% confidence interval, estimated from random effects meta-analysis; red line is the prediction interval.

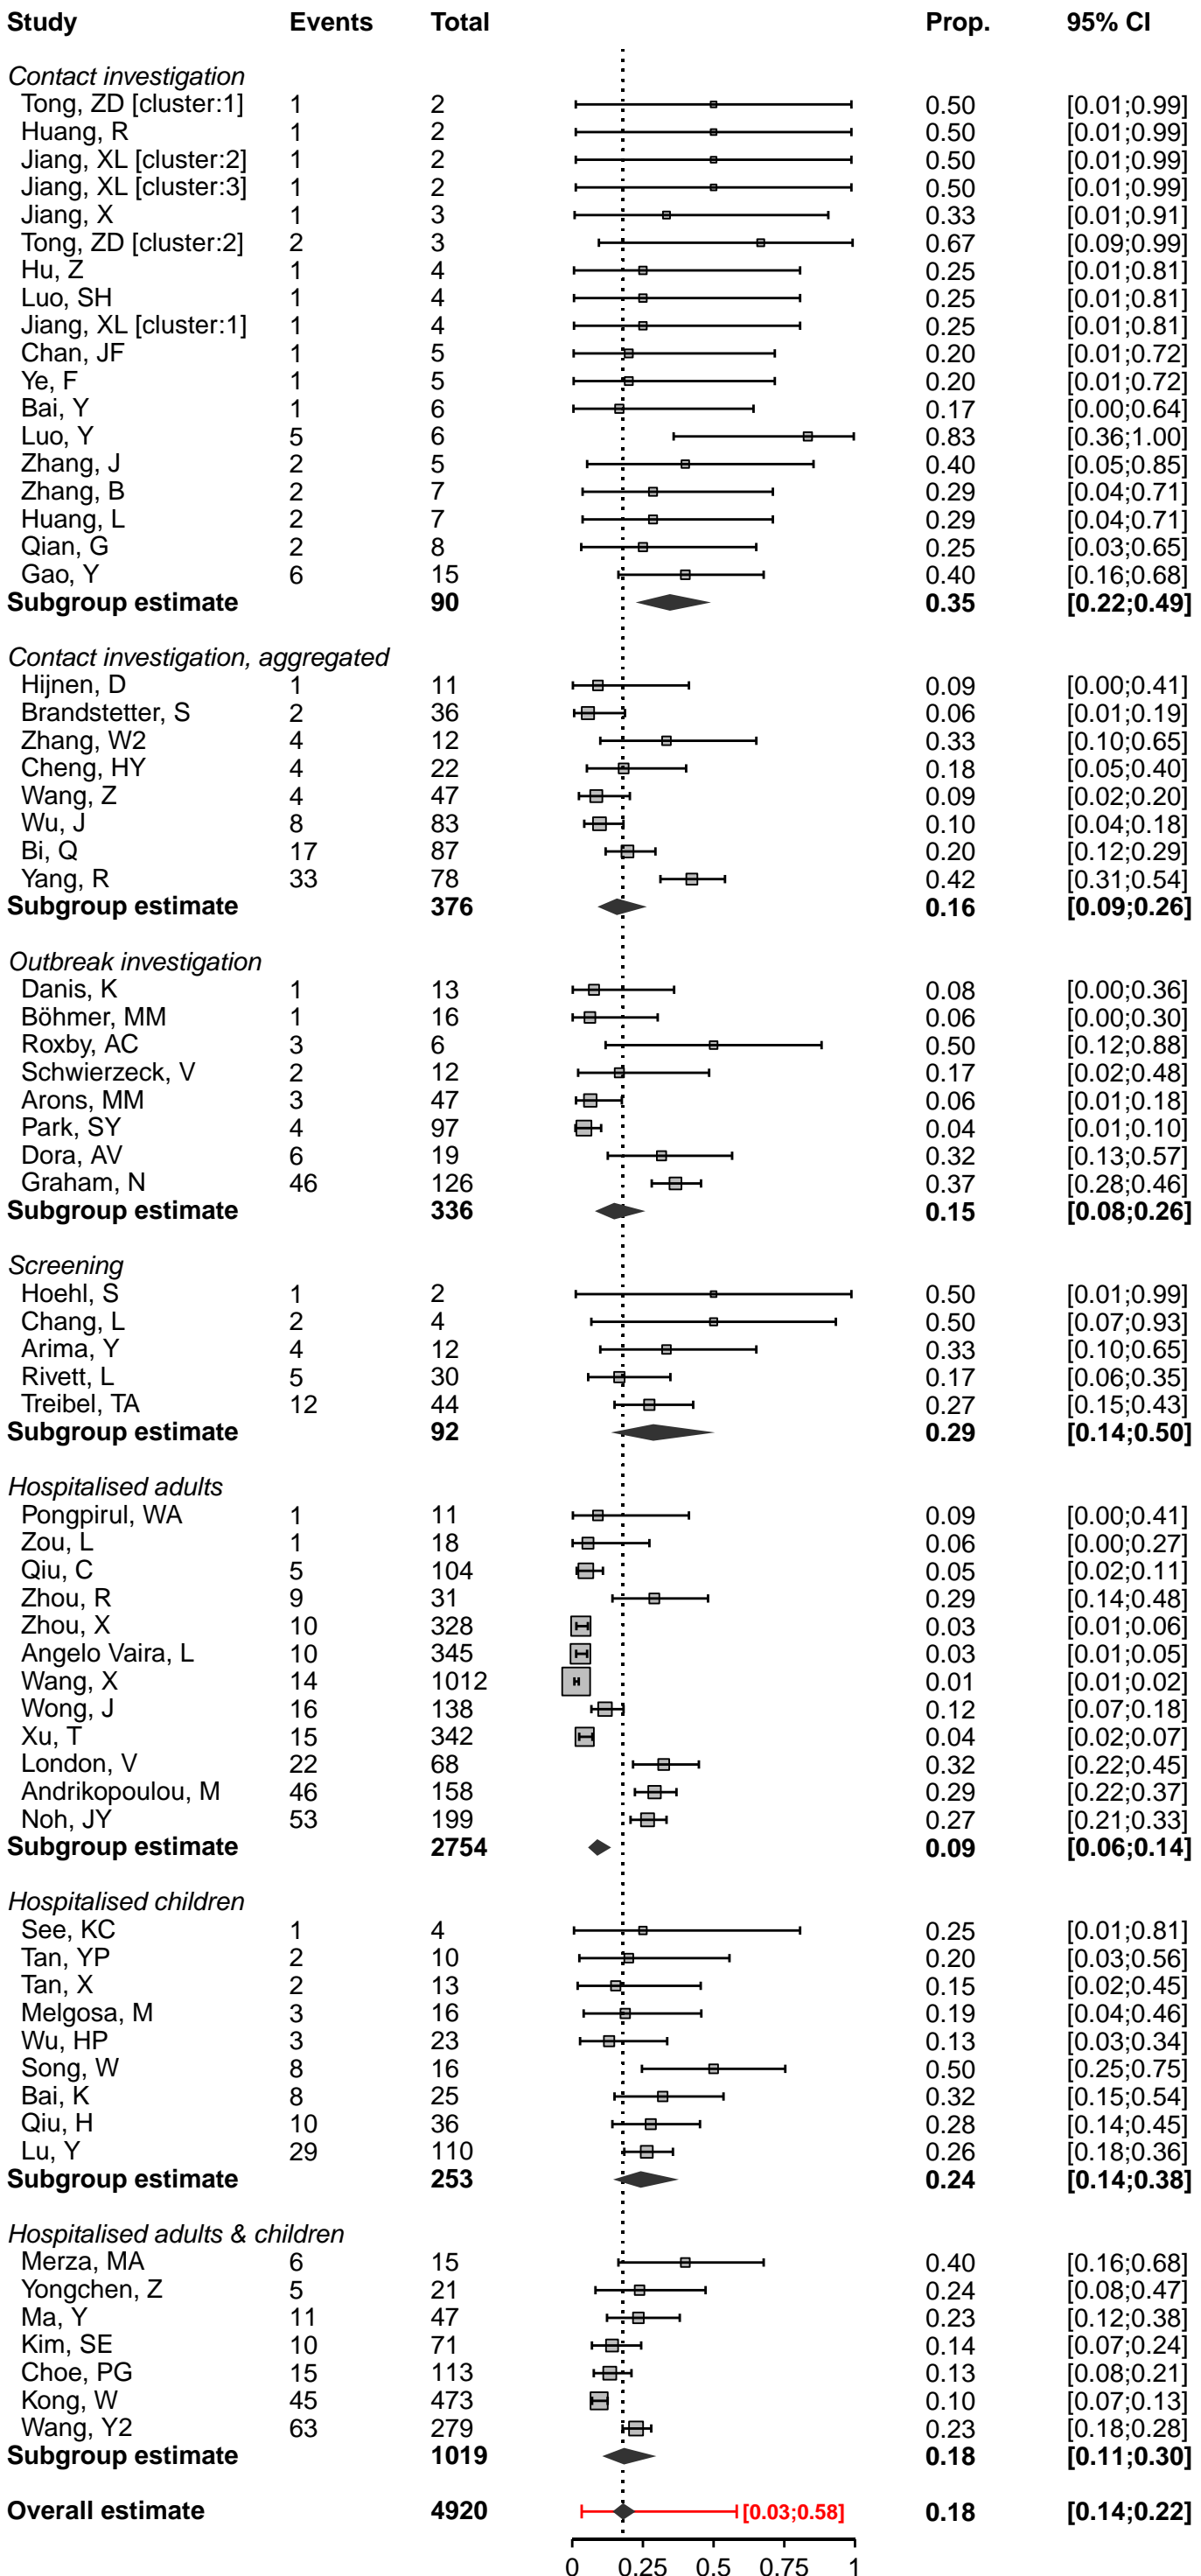

**S6 Figure. Review question 1, forest plot of included studies, published in peer-reviewed journal**

The size of the shaded square is proportional to study size; solid diamond is the summary proportion and 95% confidence interval, estimated from random effects meta-analysis; red line is the prediction interval.

**S7 Figure. Relevance and credibility of mathematical modelling studies assessing contribution of asymptomatic and pre-symptomatic infection to SARS-CoV-2 transmission**

| Author      | 1<br>Is the population relevant? | 2<br>Are any critical interventions missing? | 3<br>Is the context (settings and circumstances) applicable? | 4<br>Is external validation of the model sufficient to make its results credible for your decision? | 5<br>Is internal verification of the model sufficient to make its results credible for your decision? | 6<br>Does the model have sufficient face validity to make its results credible for your decision? | 7<br>Is the design of the model adequate for your decision problem? | 8<br>Are the data used in populating the model suitable for your decision problem? | 9<br>Were the analyses performed using the model adequate to inform your decision problem? | 10<br>Was there an adequate assessment of the effects of uncertainty? | 11<br>Was the reporting of the model adequate to inform your decision problem? | 12<br>Was the interpretation of results fair and balanced? | 13<br>Were there any potential conflicts of interest? |
|-------------|----------------------------------|----------------------------------------------|--------------------------------------------------------------|-----------------------------------------------------------------------------------------------------|-------------------------------------------------------------------------------------------------------|---------------------------------------------------------------------------------------------------|---------------------------------------------------------------------|------------------------------------------------------------------------------------|--------------------------------------------------------------------------------------------|-----------------------------------------------------------------------|--------------------------------------------------------------------------------|------------------------------------------------------------|-------------------------------------------------------|
| Ferretti, L | Partial                          | NA                                           | Yes                                                          | No                                                                                                  | Yes                                                                                                   | Yes                                                                                               | Yes                                                                 | Partial                                                                            | Yes                                                                                        | Yes                                                                   | Yes                                                                            | No                                                         | No                                                    |
| Ganyani, T  | Partial                          | NA                                           | Yes                                                          | No                                                                                                  | Yes                                                                                                   | Yes                                                                                               | Yes                                                                 | Partial                                                                            | Yes                                                                                        | Partial                                                               | Yes                                                                            | Partial                                                    | No                                                    |
| Zhang, W    | Partial                          | NA                                           | Yes                                                          | No                                                                                                  | Yes                                                                                                   | No                                                                                                | Partial                                                             | Partial                                                                            | No                                                                                         | No                                                                    | No                                                                             | No                                                         | Unclear                                               |
| He, X       | Partial                          | NA                                           | Yes                                                          | No                                                                                                  | Yes                                                                                                   | Yes                                                                                               | Yes                                                                 | Partial                                                                            | Yes                                                                                        | Yes                                                                   | Partial                                                                        | Yes                                                        | No                                                    |
| Emery, JC   | Partial                          | NA                                           | Yes                                                          | Partial                                                                                             | Yes                                                                                                   | Yes                                                                                               | Partial                                                             | Partial                                                                            | Yes                                                                                        | Yes                                                                   | Yes                                                                            | Yes                                                        | No                                                    |
| Casey, M    | Yes                              | NA                                           | Yes                                                          | Partial                                                                                             | Yes                                                                                                   | Partial                                                                                           | Yes                                                                 | Yes                                                                                | Partial                                                                                    | Yes                                                                   | Yes                                                                            | Yes                                                        | No                                                    |
| Kim, Y      | Partial                          | NA                                           | Yes                                                          | No                                                                                                  | Yes                                                                                                   | Yes                                                                                               | Yes                                                                 | Partial                                                                            | Yes                                                                                        | Yes                                                                   | Yes                                                                            | Partial                                                    | No                                                    |
| Peak, CM    | Yes                              | NA                                           | Partial                                                      | No                                                                                                  | Yes                                                                                                   | Partial                                                                                           | Yes                                                                 | No                                                                                 | Partial                                                                                    | Partial                                                               | Partial                                                                        | Yes                                                        | No                                                    |

Checklist from ref 13. Jaime Caro J, et al. Value Health 2014;17:174-82.

Partial: item is partially addressed

NA: Not applicable

# PRISMA 2009 Checklist

| Section/topic             | #  | Checklist item                                                                                                                                                                                                                                                                                              | Reported by section, in paragraph # |
|---------------------------|----|-------------------------------------------------------------------------------------------------------------------------------------------------------------------------------------------------------------------------------------------------------------------------------------------------------------|-------------------------------------|
| <b>TITLE</b>              |    |                                                                                                                                                                                                                                                                                                             |                                     |
| Title                     | 1  | Identify the report as a systematic review, meta-analysis, or both.                                                                                                                                                                                                                                         | Title                               |
| <b>ABSTRACT</b>           |    |                                                                                                                                                                                                                                                                                                             |                                     |
| Structured summary        | 2  | Provide a structured summary including, as applicable: background; objectives; data sources; study eligibility criteria, participants, and interventions; study appraisal and synthesis methods; results; limitations; conclusions and implications of key findings; systematic review registration number. | Abstract                            |
| <b>INTRODUCTION</b>       |    |                                                                                                                                                                                                                                                                                                             |                                     |
| Rationale                 | 3  | Describe the rationale for the review in the context of what is already known.                                                                                                                                                                                                                              | 1-2                                 |
| Objectives                | 4  | Provide an explicit statement of questions being addressed with reference to participants, interventions, comparisons, outcomes, and study design (PICOS).                                                                                                                                                  | 3                                   |
| <b>METHODS</b>            |    |                                                                                                                                                                                                                                                                                                             |                                     |
| Protocol and registration | 5  | Indicate if a review protocol exists, if and where it can be accessed (e.g., Web address), and, if available, provide registration information including registration number.                                                                                                                               | 1                                   |
| Eligibility criteria      | 6  | Specify study characteristics (e.g., PICOS, length of follow-up) and report characteristics (e.g., years considered, language, publication status) used as criteria for eligibility, giving rationale.                                                                                                      | 3                                   |
| Information sources       | 7  | Describe all information sources (e.g., databases with dates of coverage, contact with study authors to identify additional studies) in the search and date last searched.                                                                                                                                  | 2                                   |
| Search                    | 8  | Present full electronic search strategy for at least one database, including any limits used, such that it could be repeated.                                                                                                                                                                               | 2, S1 Text                          |
| Study selection           | 9  | State the process for selecting studies (i.e., screening, eligibility, included in systematic review, and, if applicable, included in the meta-analysis).                                                                                                                                                   | 4                                   |
| Data collection process   | 10 | Describe method of data extraction from reports (e.g., piloted forms, independently, in duplicate) and any processes for obtaining and confirming data from investigators.                                                                                                                                  | 4                                   |

## PRISMA 2009 Checklist

|                                    |    |                                                                                                                                                                                                                        |                            |
|------------------------------------|----|------------------------------------------------------------------------------------------------------------------------------------------------------------------------------------------------------------------------|----------------------------|
| Data items                         | 11 | List and define all variables for which data were sought (e.g., PICOS, funding sources) and any assumptions and simplifications made.                                                                                  | 4                          |
| Risk of bias in individual studies | 12 | Describe methods used for assessing risk of bias of individual studies (including specification of whether this was done at the study or outcome level), and how this information is to be used in any data synthesis. | 6                          |
| Summary measures                   | 13 | State the principal summary measures (e.g., risk ratio, difference in means).                                                                                                                                          | 5                          |
| Synthesis of results               | 14 | Describe the methods of handling data and combining results of studies, if done, including measures of consistency (e.g., $I^2$ ) for each meta-analysis.                                                              | 7                          |
| Risk of bias across studies        | 15 | Specify any assessment of risk of bias that may affect the cumulative evidence (e.g., publication bias, selective reporting within studies).                                                                           | Not done                   |
| Additional analyses                | 16 | Describe methods of additional analyses (e.g., sensitivity or subgroup analyses, meta-regression), if done, indicating which were pre-specified.                                                                       | 7                          |
| <b>RESULTS</b>                     |    |                                                                                                                                                                                                                        |                            |
| Study selection                    | 17 | Give numbers of studies screened, assessed for eligibility, and included in the review, with reasons for exclusions at each stage, ideally with a flow diagram.                                                        | 1, S1 Fig                  |
| Study characteristics              | 18 | For each study, present characteristics for which data were extracted (e.g., study size, PICOS, follow-up period) and provide the citations.                                                                           | Table 1, Table 2           |
| Risk of bias within studies        | 19 | Present data on risk of bias of each study and, if available, any outcome level assessment (see item 12).                                                                                                              | 3, S3 Fig, S7 Fig          |
| Results of individual studies      | 20 | For all outcomes considered (benefits or harms), present, for each study: (a) simple summary data for each intervention group (b) effect estimates and confidence intervals, ideally with a forest plot.               | Fig 1, Fig 2, Fig 3, Fig 4 |
| Synthesis of results               | 21 | Present results of each meta-analysis done, including confidence intervals and measures of consistency.                                                                                                                | 4, 5, 6                    |
| Risk of bias across studies        | 22 | Present results of any assessment of risk of bias across studies (see Item 15).                                                                                                                                        | Not done                   |
| Additional analysis                | 23 | Give results of additional analyses, if done (e.g., sensitivity or subgroup analyses, meta-regression [see Item 16]).                                                                                                  | 8                          |
| <b>DISCUSSION</b>                  |    |                                                                                                                                                                                                                        |                            |
| Summary of evidence                | 24 | Summarize the main findings including the strength of evidence for each main outcome; consider their relevance to key groups (e.g., healthcare providers, users, and policy makers).                                   | 1, 5-7                     |

## PRISMA 2009 Checklist

|                |    |                                                                                                                                                               |          |
|----------------|----|---------------------------------------------------------------------------------------------------------------------------------------------------------------|----------|
| Limitations    | 25 | Discuss limitations at study and outcome level (e.g., risk of bias), and at review-level (e.g., incomplete retrieval of identified research, reporting bias). | 3        |
| Conclusions    | 26 | Provide a general interpretation of the results in the context of other evidence, and implications for future research.                                       | 8        |
| <b>FUNDING</b> |    |                                                                                                                                                               |          |
| Funding        | 27 | Describe sources of funding for the systematic review and other support (e.g., supply of data); role of funders for the systematic review.                    | Metadata |

*From:* Moher D, Liberati A, Tetzlaff J, Altman DG, The PRISMA Group (2009). Preferred Reporting Items for Systematic Reviews and Meta-Analyses: The PRISMA Statement. PLoS Med 6(6): e1000097. doi:10.1371/journal.pmed1000097
